# Supplementary material for: Multiple interaction regulated phase transition behavior of thermo-responsive copolymers containing cationic poly(ionic liquid)s
Source: Royal Society of Chemistry journal article supplement (doi:10.1039/c7cp05846b), 2017-01-01
Supplement: c7cp05846b1.pdf [file c7cp05846b1.pdf]

## Supporting Information (SI)

# Multiple Interactions Regulated Phase Transition Behavior of Thermo-responsive Copolymers Containing Cationic Poly(ionic liquid)s

Yingna Zhang, Hui Tang\* and Peiyi Wu\*

State Key Laboratory of Molecular Engineering of Polymers, Department of Macromolecular Science and Laboratory of Advanced Materials, Fudan University, Shanghai 200433, People's Republic of China.

### Synthesis of copolymers

**Scheme S1.** Chemical structures and Synthesis of copolymers

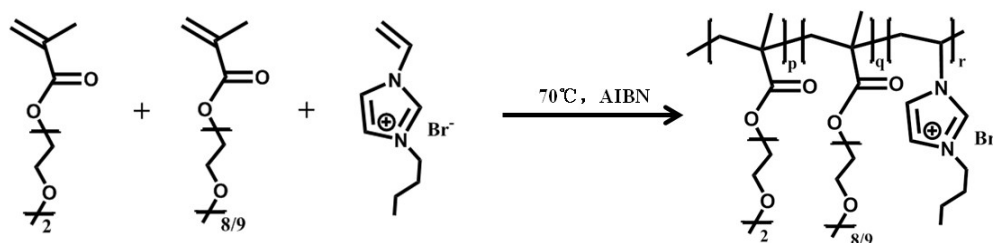

## <sup>1</sup>H NMR

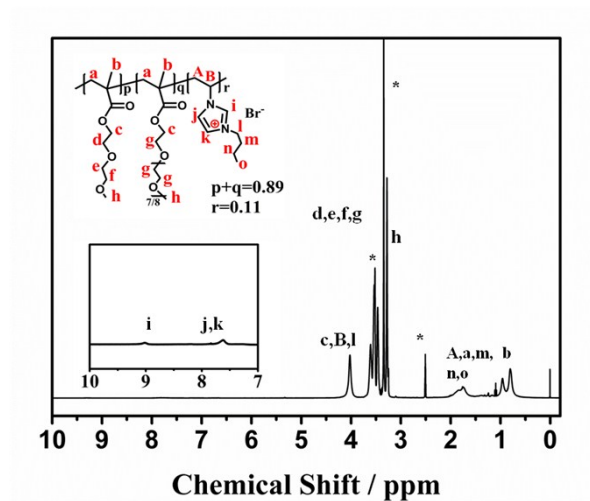

**Figure S1.** <sup>1</sup>H-NMR spectra of P(OEGMA-*co*-BVIm[Br]) copolymer (DMSO-*d*<sub>6</sub>).

## DLS

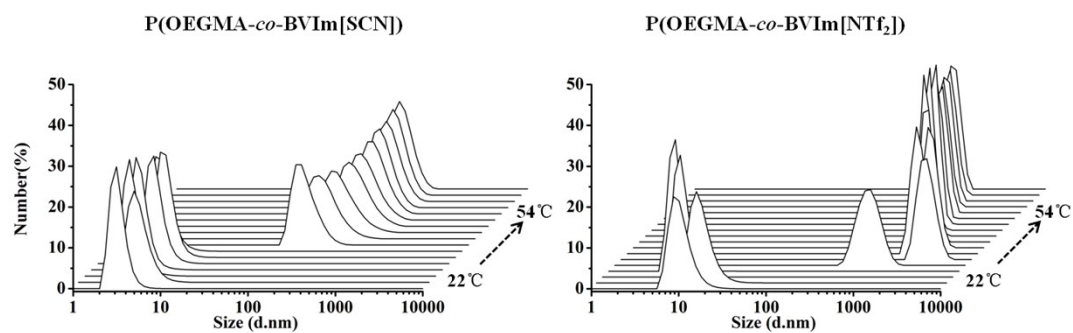

**Figure S2.** Size distributions of P(OEGMA-*co*-BVIm[SCN]) and P(OEGMA-*co*-BVIm[NTf<sub>2</sub>]) solutions with an interval of 2.0 °C during heating.

## TEM

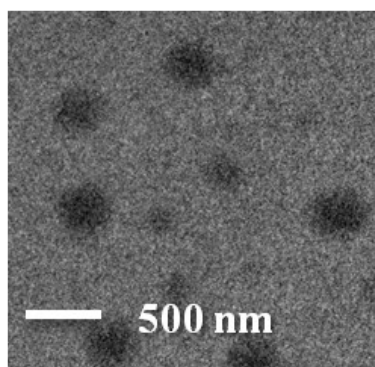

**Figure S3.** TEM image of P(OEGMA-*co*-BVIm[SCN]) at 50°C in air-dried state.

## Perturbation Correlation Moving Window (PCMW)

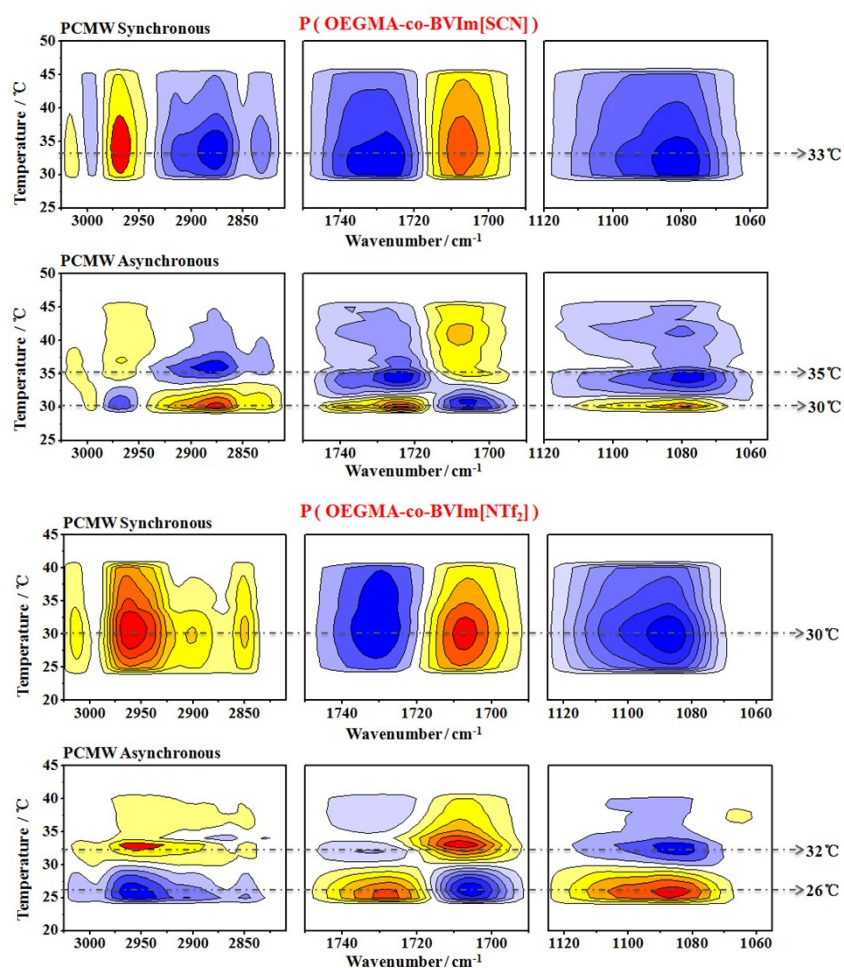

**Figure S4.** PCMW synchronous and asynchronous spectra of P(OEGMA-*co*-BVIm[SCN]) solution between 25 to 50 °C and P(OEGMA-*co*-BVIm[NTf<sub>2</sub>]) solution between 20 to 45 °C during heating.

## Two-Dimensional Correlation Analysis (2Dcos).

**Noda's rule:** when the cross-peaks of  $\nu_1$  and  $\nu_2$  ( $\nu_1 > \nu_2$ ) in synchronous and asynchronous spectra have the same symbol (both positive or negative), then the change at peak  $\nu_1$  has an earlier response than that at peak  $\nu_2$ , and vice versa.

**Table S1.** Final results of multiplication on the signs of each cross-peak in the synchronous and asynchronous spectra of P(OEGMA-*co*-BVIm[SCN]).

|      |      |      |      |      |      |      |      |      |      |      |      |      |      |
|------|------|------|------|------|------|------|------|------|------|------|------|------|------|
| 1077 | +    | +    | +    | +    | +    | -    | -    | -    | +    | +    | -    | +    |      |
| 1096 | +    | +    | +    | +    | +    | -    | -    | -    | +    | +    | -    |      |      |
| 1714 | +    | +    | +    | +    | +    | +    | +    | -    | +    | +    |      |      |      |
| 1732 | +    | -    | +    | +    | +    | -    | -    | -    | +    |      |      |      |      |
| 2822 | +    | -    | +    | +    | +    | -    | -    | -    |      |      |      |      |      |
| 2835 | +    | +    | +    | +    | +    | +    | +    |      |      |      |      |      |      |
| 2867 | +    | +    | +    | +    | +    | +    |      |      |      |      |      |      |      |
| 2874 | +    | +    | +    | +    | +    |      |      |      |      |      |      |      |      |
| 2916 | -    | -    | +    | +    |      |      |      |      |      |      |      |      |      |
| 2935 | -    | -    | +    |      |      |      |      |      |      |      |      |      |      |
| 2956 | -    | -    |      |      |      |      |      |      |      |      |      |      |      |
| 2985 | +    |      |      |      |      |      |      |      |      |      |      |      |      |
| 2992 |      |      |      |      |      |      |      |      |      |      |      |      |      |
|      | 2992 | 2985 | 2956 | 2935 | 2916 | 2874 | 2867 | 2835 | 2822 | 1732 | 1714 | 1096 | 1077 |

**Table S2.** Final results of multiplication on the signs of each cross-peak in the synchronous and asynchronous spectra of P(OEGMA-*co*-BVIm[NTf<sub>2</sub>]).

|      |      |      |      |      |      |      |      |      |      |      |      |      |      |      |      |      |
|------|------|------|------|------|------|------|------|------|------|------|------|------|------|------|------|------|
| 1077 | -    | -    | +    | +    | -    | +    | -    | -    | -    | -    | -    | +    | +    | +    | +    |      |
| 1096 | -    | -    | +    | +    | -    | +    | -    | -    | -    | -    | -    | -    | +    | -    |      |      |
| 1704 | -    | -    | +    | +    | -    | +    | -    | -    | -    | -    | -    | -    | +    |      |      |      |
| 1715 | -    | -    | -    | -    | -    | +    | -    | -    | -    | -    | -    | -    |      |      |      |      |
| 1728 | -    | -    | +    | +    | -    | +    | -    | -    | -    | -    | -    |      |      |      |      |      |
| 1736 | -    | -    | +    | +    | -    | +    | +    | -    | -    | -    |      |      |      |      |      |      |
| 1740 | +    | +    | +    | +    | +    | +    | +    | -    | +    |      |      |      |      |      |      |      |
| 2823 | -    |      | +    | +    | -    | +    | +    | -    |      |      |      |      |      |      |      |      |
| 2836 | +    | +    | +    | +    | +    | +    | +    |      |      |      |      |      |      |      |      |      |
| 2867 | -    | -    | +    | +    | -    | +    |      |      |      |      |      |      |      |      |      |      |
| 2875 | -    | -    | -    | -    | -    |      |      |      |      |      |      |      |      |      |      |      |
| 2914 | -    | -    | +    | +    |      |      |      |      |      |      |      |      |      |      |      |      |
| 2947 | -    | -    | -    |      |      |      |      |      |      |      |      |      |      |      |      |      |
| 2955 | -    | -    |      |      |      |      |      |      |      |      |      |      |      |      |      |      |
| 2983 | -    |      |      |      |      |      |      |      |      |      |      |      |      |      |      |      |
| 2993 |      |      |      |      |      |      |      |      |      |      |      |      |      |      |      |      |
|      | 2993 | 2983 | 2955 | 2947 | 2914 | 2875 | 2867 | 2836 | 2823 | 1740 | 1736 | 1728 | 1715 | 1704 | 1096 | 1077 |
